# Supplementary material for: Decolonizing AI Ethics in Education: A Systematic Review and the Framework for Glocalized AI Ethics in Education (FGAIEE)
Source: Research Square preprint supplement (doi:10.21203/rs.3.rs-8417921/v1), 2025-12-25
Supplement: Supplementary file 1 [file 7a8456a2be7a850c8f214cb5.docx]

# Appendix

**Table 3A.** Results of the RRQ-PICo-Thematic-SWOT integration analysis

| (Author, Year) | RQ1: (Geopolitical/  Socioeconomic Disparities) | RQ2:  (Global-Local Strategies) | Key Findings | PICo  Element | SWOT  Dimension | Implication/  Recommendation |
| --- | --- | --- | --- | --- | --- | --- |
| Wakunuma & Eke (2024) | Digital exploitation & ethical marginalization in Africa. | Traditional African Ethics (ATE), Ethical Impact Assessment (EIA) | AI benefits exist but require inclusive policies to address disparities. | **Co:** African education systems facing digital labor exploitation | **W:** Lack of local governance capacity and ethical oversight | Strengthen South-North dialogue for equitable AI policies. |
| Yadav et al. (2025) - Accessibility | Digital divide exacerbates AI education inequality | Low bandwidth + policybased AI solution accessibility | Algorithmic bias must be mitigated for inclusive design. | **P:** Underserved learners in low-bandwidth environments | **T:** Algorithmic exclusion due to digital divides | Develop localized AI tools with multilingual support. |
| Yadav et al. (2024) - Lifelong | Low-resource contexts limit AI adoption ` | ConveGenius technology adaptation case study | Teacher training is critical for sustainable AI integration. | **Co:** Lifelong learning ecosystems in India and similar contexts | **O:** Public-private partnerships for low-tech scalability | Public-private partnerships for infrastructure investment. |
| Shams et al. (2023) | Algorithmic bias in educational AI | 33 solution**S:** participatory design, diverse data | Inclusive AI requires interdisciplinary collaboration. | **P:** Marginalized communities excluded from AI design | **S:** Identified 33 D&I interventions including participatory audits | Adopt UNESCO’s ROAM-X framework for ethical AI. |
| Herath et al. (2024) | SDGs highlight disparities in AI’s environmental/social impact. | AI for clean energy in LMICs aligns with SDG7. | Ethical AI must prioritize sustainability. | **Co:** AI for clean energy education in LMICs | **O:** Aligning AI with SDG7 and equitable access | Link AI ethics to SDG indicators |
| Lombana Diaz (2025) | Lack of regulation leads to privacy violations and bias | Metaphor story people for principle ethics local | Cultural narratives can bridge global-local ethics. | **Co:** Localized ethics education using metaphors | **W:** Lack of culturally adapted ethics curricula | Decolonial frameworks for contextualized AI norms. |
| Zowghi & Bano (2024) | Marginalized groups underrepresented in AI design. | "AI for All" advocates participatory development. | Trustworthy AI requires diverse stakeholder input. | **P:** Excluded groups in educational AI systems | **S:** Participatory development approach (AI for All) | Apply UNESCO’s D&I indicators to AI audits. |
| Muralidharan et al. (2024) | Pediatric AI biases in LMICs due to data scarcity. | Human-centered AI for local healthcare workers. | Global collaboration needed for child-specific AI. | **Co:** Pediatric AI deployment in LMIC schools/clinics | **T:** Lack of child-specific AI policies or datasets | Fund LMIC-led AI research for pediatric care. |
| Sahebi & Formosa (2024) | AI supply chain exploits labor/resources in LMICs. | Capabilities Approach to assess AI’s impact on dignity. | AI harms well-being thresholds in LMICs. | **P:** AI supply chain workers in low-income contexts | **W:** Exploitation and lack of redistribution in AI economy | Redistribute AI profits to affected communities (decolonial justice). |
| Curtis et al. (2024) | Global North epistemic dominance | Human-centered AI governance | AI in comparative education risks reinforcing structural inequality | **P:** Educators and learners | **T:** Epistemic colonialism and policy silence | Decolonize AI in CIE; prioritizing Global South knowledge systems |
| Papakostas (2025) | Ethical tensions in theological AI use | Ethical-pedagogical integration | AI in RE enhances pedagogy but risks epistemic distortion | **P:** stakeholders in religious education | **S:** Interdisciplinary ethical innovation | Build interdisciplinary ethics into RE curricula |
| Manjula Devi et al. (2025) | Access & equity via AI | Inclusive & immersive learning design | AI can bridge disparities but needs ethical safeguards | **P:** Underserved Learners | **S:** Inclusive and immersive AI access | AI must be implemented with contextual ethical frameworks |
| Ilcic et al. (2025) | Governance complexity & systemic inequity | Governance framework​ based on complexity | AI’s double-edged potential demands adaptive governance | **P:** Policy Makers | **O:** Complexity-informed governance models | Adopt inclusive, complexity-aware governance models |
| Gondwe (2024) | Western AI tools do not represent African journalism | Ubuntu philosophy guides relational, equitable AI. | Cultural values must shape AI design. | **Co:** African journalism and media education | **O:** Ubuntu ethics guiding design and policy | Integrate Ubuntu into UNESCO’s AI competency frameworks. |
| Henadirage & Gunarathne (2025) | Sri Lanka’s policy gaps hinder GenAI adoption. | Academic training programs to address resistance. | Local expertise is key to overcoming barriers. | **Co:** Sri Lanka’s higher education | **T:** Lack of institutional readiness for AI | Develop national AI policies aligned with regional needs. |
| Arora et al. (2023) | Algorithmic bias and data colonialism in education | Relational risk perspective to balance harm/benefit | Need prescient policies to address bias and labor exploitation | **P:** Global South data laborers and users | **W:** Data colonialism, lack of data sovereignty | Advocate for data sovereignty and inclusive algorithm design |
| Ammah et al. (2024) | Western-centric AI ethics marginalize African values | Integrate indigenous frameworks | African philosophies offer viable ethical alternatives | **Co:** Schools in Ghana using AI4People framework | **O:** Indigenous ethics for contextual AI governance | Centering indigenous knowledge in AI ethics frameworks |
| Olojede (2023) | AI regulation dominated by Northern perspectives | Principle solidarity & dignity (Africa) | Inclusive AI ethics must integrate Majority World values | **I:** Dignity and solidarity ethics | **O:** Complementarity ethics **S:** Culturally rich alternatives) | Decolonize AI ethics via subsidiarity and natural law |
| Astobiza et al. (2022) | Global South lacks governance capacity; suffers Northern extractivism | Human rights-based multi-level governance | Ethical AI must address power imbalances and dependency | **Co:** Global South Community | **W:** Inequality power | Empower Southern voices in global AI policy |
| Madlberger (2017) | Lack of AI data shows global tech inequality | Collaborative mobile NLP annotation | Digital gotong royong operationalizes AI ethics | **P:**Students, **I**:AI/NLP, **Co:** Indonesia | **O:** (innovation), **W**: (low dataset availability) | UNESCO: Promote open, inclusive AI ethics tools (AI for All) |
| Roche et al. (2023) | Global North dominates AI ethics discourse; gender | Participatory policy formulation | Current AI ethics lack socio-cultural inclusivity | **P:** Marginalized groups | **W:** Lack of socio-cultural inclusivity | Include marginalized groups in AI ethics formulation |
| Liu (2025) | LLMs perpetuate cultural bias, threatening linguistic diversity | Mitigation: diverse training data, transparency, user feedback | Responsible AI must address bias in data, design, and interaction | **P:** Multilingual learners **I:** Cultural-linguistic | **T:** Language bias **W:** Lack of diversity in datasets | Adopt UNESCO’s intercultural competence indicators |
| Zembylas (2023) | Coloniality of AI ethics in higher education | Decolonial strategies | Decentering Northern epistemologies is key to ethical AI | **Co:** Higher education (AI literacy) | **O:** Decolonial pedagogy | Apply decolonial pedagogy in AI literacy programs |
| Hussein (2025) | AI in special education overlooks low-resource settings | Tailored interventions for disabilities; address data privacy | Inclusive AI tools must prioritize accessibility and equity | **P:** Disabled populations | **O:** Inclusive tools | Expand AI access in Global South; ethical safeguards for vulnerable groups |
| Ng et al.  (2021b) | AI literacy gaps exacerbate socio-technical divides | Four-pillar framework (know, use, evaluate, ethics) | Foundational for equitable AI adoption | **I:** Literacy 4-pillars **Co:** School-based AI learning | **S:** Literacy framework **O:** National integration | Integrate AI literacy into national curricula |
| Wach et al. (2023) | ChatGPT widens inequalities (job loss, privacy risks) | Regulation, upskilling, and ethical guidelines | Urgent need for legal frameworks to mitigate GAI risks | **P:** Global learners **I:** AI inequality **Co:** Higher education | **T:** Privacy/job loss **W:** Policy void | Align AI policies with UNESCO’s RRI (Responsible Research and Innovation) |
| Pessach & Shmueli, (2023) | Bias in ML algorithms disproportionately affects marginalized groups. | Pre-/post-process fairness mechanisms to mitigate bias. | Fairness metrics must account for socioeconomic disparities. | **Co:** Contextual fairness | **W:** Algorithmic bias | Adopt context-aware fairness frameworks in educational AI. |
| Esmaeilzadeh (2024) | Healthcare AI disparities reflect global inequities in resource allocation. | Align AI deployment with local workflows and financial models. | AI cannot fix flawed systems without addressing root causes (e.g., fee-for-service). | **P:** Healthcare populations | **T:** Regulatory gaps | Decentralize AI governance to address local healthcare needs. |
| Baker (2022) | Algorithmic bias in education intersects with race, gender, and disability. | Equity frameworks to transition from "fairness" to "equity." | Understudied biases (e.g., military status) require targeted research. | **Co:** Contextual biases | **S:** Equity focus | Prioritize equity audits in AIED systems. |
| Zhang (2023) | Middle school AI literacy must address ethical implications. | Integrate ethics and career futures into technical AI curricula. | Students view AI as sociotechnical, not just technical. | **I:** Ethical implications | **O:** Holistic literacy | Scale ethics-integrated AI programs globally with local adaptations. |
| Kim (2022) | Cultural differences shape student-AI collaboration | Three-stage SAC model: learn about/from/together with AI. | Teachers emphasize interdisciplinary learning and "safe-to-fail" environments. | **Co:** Cultural contexts) | **S:** Staged learning | Develop culturally responsive SAC frameworks. |
| Vartiainen (2023) | Generative AI in crafts risks exacerbating cultural appropriation and bias. | Hands-on workshops to critique AI’s role in creative practices. | Teachers highlight tradeoffs between AI efficiency and craft authenticity. | **Co:** Creative disciplines | **W:** Copyright risks | Teach critical AI literacy in creative disciplines. |
| Stolpe, K. (2024) | Framing AI literacy in socio-ethical tech ed | Curriculum-integrated AI ethics | Ethical understanding of AI must be integral to tech ed | **I:** Curriculum;  **Co:** National Systems | **S:** Curriculum-embedded AI ethics | Institutionalize AI ethics as part of tech curriculum |
| Schiff (2022) | National AI policies prioritize workforce readiness over ethical AIED. | Advocate for AIED ethics in policymaking via public engagement. | Global AI policies neglect AIED’s societal implications. | P (Population) | **T:** Policy neglect | Lobby for inclusive AIED policy frameworks. |
| Adams (2023) | K-12 AI ethics must decolonize to address diverse cultural norms. | Humanized posthuman ethics for child-AI collaboration. | Unique principle**S:** Children’s Rights, Teacher Well-being. | **I:** Decolonial ethics | **O:** Decolonial ethics | Center Indigenous perspectives in AI ethics curricula. |
| Ng et al. (2021a) | AI literacy gap across socio-educational strata | Multiliteracy-based ethics training | Frameworks needed to define/teach AI literacy inclusively | **I:** Literacy Gaps;  **Co:** K–12 & Higher Ed | **W:** Inconsistent AI literacy implementation | Invest in teacher training & multiliteracies for ethical AI |
| Davy Tsz Kit et al.  (2022) | Culturally responsive pedagogy in AI | Digital storytelling for AI literacy | Digital stories enable early ethical comprehension | **I:** Literacy Pedagogy; **Co:** Local Schools | **S:** Early ethical awareness through digital storytelling | Use DSW to build early ethical capacity among learners |
| Vetter, M.A. (2024) | Negotiation of AI ethics in local classrooms | Emergent classroom-based ethics | Local 'ethics-in-practice' arises in teacher-student negotiation | **I:** AI Use;  **Co:** Classroom Micro-ethics | **O:** Participatory classroom ethics | Develop participatory ethics at the classroom level |
| Almufareh (2024) | Disability inclusion in AI is hindered by data biases and digital divides. | Tailor assistive AI to local disability contexts | AI improves mobility/education but requires ethical safeguards. | **P:** Disabled populations | **S:** Inclusive design | Co-design AI solutions with disability communities. |
| Tubella, A. (2024) | Policy gaps in teaching Trustworthy AI | Translation of policy into pedagogy | EU ethics policies need curricular translation | **P:** Policy Actors;  **I:** Trustworthy AI;  **Co:** Highe | **O:** Policy-to-practice translation | Translate AI policies into educational action plans |
| Du et al. (2024) | Chinese teachers’ AI learning intentions are tied to social good perceptions. | Boost AI literacy to enhance self-efficacy and ethics awareness. | AI literacy indirectly drives behavioral intentions. | **I:** Interest in AI education | **O:** Professional growth | Invest in teacher AI literacy programs with ethical modules. |
| Wang (2023) | Bias varies by healthcare infrastructure quality | Multisource data reduces subgroup disparities | Well-trained models show cross-demographic fairness | **Co:** Clinical settings | **S:** High AUC across groups | Advocate for diverse training datasets |
| Perchik (2023) | US specialty training disparities | Multi-institutional remote courses | 96.7% lack prior AI exposure | **I:** Radiology education | **W:** Specialty silos | Standardize cross-discipline AI literacy |
| Bečulić (2023) | Neurosurgical AI adoption varies by region | Case-specific validation protocols | Benefits tempered by "black box" risks | **P:** Surgeons | **T:** Validation challenges | Develop specialty-specific audit tools |
| Adetayo (2024) | Bias in library AI systems | Responsible AI frameworks for info access | AI tools can democratize info but risk bias if unregulated | **P:** Library Users;  **I:** Equity;  **Co:** Education & Libraries | **T:** Risk of unregulated algorithmic bias | Ensure algorithmic transparency in learning technologies |
| Kamila & Jasrotia (2023) | Ethical vacuums in autonomous AI development | AI governance reform for ethics-by-desig | Bias, opacity, and lack of accountability threaten AI ethics | **P:** Public & Developers | **W:** Lack of transparency and accountability | Advance ethical-by-design approaches in all AI tools |
| Novozhilova (2024) | Public trust variation across domains | Civic trust and participatory safeguards | Trust in AI is domain-specific and affected by data transparency | **P:** General Public  **I:** Trust Beliefs;  **Co:** Cross-sectoral | **T:** Distrust in AI in education sector | Promote public education & ethical accountability in AI |
| Fundi (2024) | Kenyan CBC reform lacks AI teacher prep | In-service PD programs for LMICs | Confidence in ethics predicts readiness | **P:** Teachers | **O:** Curriculum reform | Align teacher training with CBC digital goals |
| Sanchez (2024) | AI urban planning exacerbates Global South inequities | Community engagement frameworks | Marginalized groups disproportionately affected | **Co:** Urban communities | **T:** Data colonialism | Mandate participatory design for civic AI |
| Lin (2023) | Asian primary schools lack ethics tools | AR role-play for contextual learning | 79 students showed improved ethical reasoning | **I:** Primary ethics | **S:** Immersive pedagogy | Scale AR tools for collectivist cultures |
| Usher (2024) | Lack of AI ethics training in STEM | Online ethics modules with reflection | STEM students improve ethical reasoning with explicit modules | **P:** STEM Students;  **I:** Ethics Instruction; **Co:** Online Learning | **O:** Scalable ethics training modules | Scale explicit-reflective ethics modules across STEM |
| Almassaad (2024) | Saudi students show high GenAI adoption | Culturally adapted TAM/TTF guidelines | 86.2% use ChatGPT despite plagiarism concerns | **Co**: Middle East HE | **O:** Regional adoption | Develop Arabic-language AI integrity modules |
| Barman (2024) | LLM risks amplified in low-literacy contexts | Task-specific heuristics for educators | Prompt engineering reduces misuse | **I:** User education | **W:** Over-reliance on transparency | Create localized "AI cheat sheets" |
| Katznelson (2021) | Urgency of ethics education in medical training | Case-based learning in AI ethics | Medical students face unaddressed AI ethics gaps | **P:** Med Students;  **I:** AI Ethics Gap;  **Co:** Health Educatio | **W:** Ethics-technology gap in health curricula | Mandate ethics training for medical tech users |
| Popenici (2023) | Tech titans dominate Global South edtech | Critical pedagogy for decolonization | Calls for Humboldtian university reforms | **P:** Academics | **T:** Corporate hegemony | Foster open-source AI education alliances |
| Chauncey (2023) | Cognitive flexibility gaps in standardized systems | Subject-specific chatbot exemplars | Math/ELA frameworks show promise | **I:** K-12 pedagogy | **S:** Curriculum integration | Train teachers as AI learning designers |
| Kwet (2019) | Digital colonialism via tech monopolies | Build counter-structures of digital sovereignty | Surveillance capitalism → digital hegemony | **I:** Ethical critique of U.S. AI imperialism;  **Co:** Networked AI systems in the Global South | **T:** AI-based control reinforces extractivism | Decentralize AI governance through civic-led infrastructures |
| Heeks (2022) | Digital inclusion creates new forms of exploitation | Power-aware design frameworks needed | “Adverse digital incorporation” leads to systemic inequity | **P:** Marginalized digital labor groups;  **Co:** Inclusion without protection in digital platforms | **W:** Inclusion ≠ empowerment; leads to new risks | Design ethical AI with safeguards for labor justice |
| Ravšelj et al. (2025) | Diverse student perceptions across 109 countries | Regulation must be context-sensitive | ChatGPT seen as helpful but ethically risky | **P:** Higher education students worldwide; | **S:** High user engagement;  **O:** Policy design opportunities | Formulate adaptive and region-aware AI policies |
| White (2025) | Lack of contextual moral frameworks | ACTWith improves moral reasoning in tech contexts | ACTWith model enables critical thinking for AI ethics | **I:** Moral reasoning in AI ethics education;  **Co:** Applied ethics pedagogy | **S:** Proven instructional model for ethics | Integrate ACTWith across global tech ethics curricula |
| Lee et al. (2024) | Curriculum fragmented between tech and ethics | Integrated learning bridges conceptual divide | Need for ethics-tech unity in AI education | **P:** South Korean secondary education;  **I:** AI curriculum reform; | **S:** Expert-informed framework;  **W:** Ethics not embedded in tech training | Mandate integrated AI-ethics curricula in national policy |
| Hassan (2023) | Eurocentric AI ethics fails African contexts | Afrocentric theorization of AI ethics | AI ethics must center postcolonial lived realities | **P:** African AI researchers;  **I:** Epistemic justice in AI ethics; | **W:** Dominant Eurocentric discourses;  **T:** Tech pathologization of African innovation | Build African AI ethics grounded in local epistemologies |
| Song (2024) | Teacher identities shape ethics instruction | Tailored ethics education for future teachers | 5 distinct typologies of preservice ethics teachers | **P:** South Korean preservice teachers;  **I:** AI ethics attitudes;  **Co:** Teacher training in moral education | **S:** Psychographic models improve pedagogy | Customize AI ethics training based on teacher profiles |
| Mager (2025) | Global norms overlook local values | "Situated ethics" ensures contextual fairness | Global principles must adapt to lived realities | **P:** Global cross-cultural participants;  **I:** Meaning of “ethics” in diverse cultures  **Co:** AI policy adaptation to local norms | **O:** Inclusive co-design of AI principles | Develop hybrid global-local AI governance models |
| Mbunge et al. (2022) | COVID exposed infrastructural inequities | Leverage crisis to push digital health equity | South Africa's health AI surged but with barriers | **P:** Rural communities in South Africa;  **I:** AI deployment in health crisis  **Co:** Pandemic-era digital response systems | **W:** Infra gaps, fragmented policy;  **O:** Acceleration of mHealth initiatives | Equitize digital health via infra + training investment |
| Reid & Major (2017) | Global South knowledge undervalued | Decolonizing global teacher mobility | Epistemic exchange is still one-directional | **P:** Teachers in/from Global South;  **I:** Diversity and postcolonial pedagogy  **Co:** Cross-border teacher education | **O:** South-led knowledge frameworks | Center indigenous pedagogies in global education policy |
| Akpan et al. (2024) | Knowledge production centralized in North | Decentralized R&D needed | Digital research output in South highly dependent | **P:** Global South e-learning researchers;  **I:** Inequity in AI-related publication access  **Co:** Bibliometric AI research analysis | **W:** R&D concentration; knowledge asymmetry;  **T:** Citation dependency on North | Fund South-based AI research and open-access platforms |
| Makeleni et al. (2023) | Language biases marginalize local academics | EdTech should serve multilingual users | Language-invisible AI tools deepen inequality | **P:** Educators in Global South universities;  **I:** AI in language education  **Co:** Higher education with digital disparity | **W:** Culturally unadapted tools;  **O:** Localized AI language platforms | Promote culturally responsive EdTech for linguistic justice |
| Hove-Sibanda et al. (2021) | Tech uptake uneven across sectors | Resilience-focused policy innovation | AI + IoT face barriers in retail supply chains | **P:** South African grocery sector;  **I:** AI in logistics  **Co:** Low-resource commercial infrastructure | **S:** Some IoT use;  **W:** Logistical & resource barriers | Localize supply chain AI based on context constraints |
| Langthaler & Bazafkan (2020) | Connectivity ≠ capacity | Don’t equate infra with outcomes | Free internet boosts skills, not attendance | **P:** Kenyan schoolchildren;  **I:** Digital skills via connectivity  **Co:** School-level infrastructure support | **W:** Internet ≠ sustained engagement;  **O:** Digital skill growth in youth | Pair infra access with content, pedagogy, teacher capacity |
| Nkwo et al. (2025) | Eurocentric AI harms usability in African cities | Build decolonial, culturally-attuned AI systems | AI in Africa marginalizes local values & agency | **P:** Sub-Saharan citizens; **I:** AI usability, cultural bias  **Co:** Urban digital design | **W:** Cultural misfit;  **T:** Ethical erasure risk | Adopt decolonial HCI & user-centered indigenous frameworks |
| Bannor et al. (2025) | Weak ethical governance affects AI trust in HE | Tailored ethics-centered chatbot training | Ethics > regulation in sustaining responsible GenAI use | **P:** Ghanaian undergrads;  **I:** Trust & intention | **S:** Ethics boost trust;  **W:** Policy–practice misalignment | Design ethics-first curricula & flexible chatbot regulation |
| Venkat Narayana Rao et al. (2025) | AI widens digital gaps in underfunded schools | Inclusive design, data transparency | Over-reliance on AI reduces teacher agency, fairness | **P:** Under-resourced learners;  **I:** Data/algorithmic fairness  **Co:** Educational AI deployment | **T:** Teacher disempowerment;  **W:** Biased data models | Human-centric policy for equitable AI in schools |
| Kayyali (2025) | GenAI risks data exploitation & academic fraud | Multi-stakeholder ethics coordination | Privacy + bias + integrity demand ethical frameworks | **P:** EdTech users in LMICs;  **I:** GenAI ethical risks  **Co:** Personalized AI learning | **W:** Unchecked automation;  **T:** Academic integrity erosion | Interdisciplinary regulation of GenAI in education |
| Kumar & Suthar (2025) | Nomadic learners excluded from mainstream AI | Humanoid AI for cultural, mobile inclusion | AI must respect learning diversity & adaptability | **P:** Cyber-nomads;  **I:** Personalized access  **Co:** Digital mobility contexts | **S:** Personalized delivery; **O:** Equity via adaptability | Inclusive AI standards for mobile/global learners |
| Abu-Lughod (2025) | Ethics often co-opted, stripped from context | Genuine decolonial praxis, not branding | Ethics must challenge Western hegemony in AI | **P:** MENA scholars;  **I:** Ethics of representation  **Co:** Global academic AI discourse | **T:** Tokenized decolonization;  **W:** Lack of epistemic reflexivity | Embed indigenous voices in ethical AI dialogue |
| Parkinson (2025) | Bureaucracy limits ethical field research | Reimagine IRB through epistemic justice | Institutional ethics often obstruct knowledge from margins | **P:** Field-based researchers;  **I:** Ethics + research freedom  **Co:** IRB/institutional gatekeeping | **W:** Bureaucratic rigidity; **T:** Methodological exclusion | Decolonize ethics review through community-based models |
| Samek (2022) | Equity ethics in LIS often symbolic | Praxis-driven racial & social justice pedagogy | Library ethics must move from codes to actions | **P:** LIS educators;  **I:** DEI ethics in curricula  **Co:** North American LIS schools | **O:** ALA Principle 9 as anchor;  **S:** Strong normative basis | Translate codes of ethics into actionable pedagogy |
| Di Chiro (2014) | Anthropocene ethics dominated by Global North | Critical pedagogy + feminist enviro-justice | Environmental ethics must localize justice & voice | **P:** Global educators;  **I:** Environmental ethics  **Co:** Ed in climate justice context | **W:** Eurocentric ecological ethics;  **O:** Decolonial EJ approach | Redesign EE with feminist, decolonial curriculum |
| Waterman (2019) | Higher Ed erases Native epistemologies | Center Indigenous knowledge in HE AI | AI in education must honor Indigenous cosmologies | **P:** Native students;  **I:** Indigenous AI ethics  **Co:** Higher education systems | **T:** Epistemic erasure;  **W:** Institutional assimilation | Co-design AI pedagogy with tribal nations |
| Nazer et al. (Nazer et al., 2023) | Algorithmic bias harms marginalized health users | Checklists to mitigate inequity in AI design | Every AI pipeline step embeds risk for bias | **P:** Health system users;  **I:** Bias mitigation  **Co:** AI in healthcare | **W:** Bias blindspots;  **O:** Inclusive audit tools | Mandate bias audits in AI healthcare deployments |
| Wójcik (2021) | Library AI lacks ethical discussion readiness | Build ethical readiness & awareness frameworks | Librarians underprepared for AI's ethical load | **P:** Public library professionals;  **I:** Ethics in augmented AI  **Co:** Info service domain | **W:** Ethical illiteracy;  **S:** Potential AI service innovation | Train librarians in AI ethics for user-centered access |
| Fedock et al. (2018) | Robots can't replicate moral judgment in Ed | Ongoing human-AI moral discourse needed | Robots require contextual ethics programming | **P:** Robotics developers;  **I:** Human ethics emulation  **Co:** Ed robotics application | **T:** Moral flattening;  **W:** Emulation rigidity | Embed plural ethics frameworks in robot design |
| Ryan & Stahl (2021) | Ethics convergence lacks operational clarity | Operationalize ethics via context-specific norms | Ethics frameworks must link principle to practice | **P:** AI developers;  **I:** Normative guidance  **Co:** Global ethics policy; | **W:** Application gap;  **S:** Normative convergence | Bridge ethical theory with use-case specificity |

**Table 3B: 15 example studies Inductive Coding Results (Cohen's κ > 0.8)**

| **Study** | **Reviewer 1 Codes** | **Reviewer 2 Codes** | **Agreement** | **Resolved Codes** |
| --- | --- | --- | --- | --- |
| Wakunuma & Eke (2024) | Bias, Governance, Global South, Cultural Diversity | Bias, AI Governance, Global South, Ethical Benefits | 90% | Bias, Governance, Global South, Cultural Diversity, Ethical Benefits |
| Yadav et al. (2025) - Accessibility | Algorithmic Bias, Digital Divide, Inclusivity | Bias, Accessibility, Policy Gaps | 85% | Algorithmic Bias, Digital Divide, Inclusivity, Policy Gaps |
| Yadav et al. (2025) - Lifelong | Low-Resource Contexts, Adaptive Learning, Infrastructure | Developing Countries, Scalability, Teacher Training | 88% | Low-Resource Contexts, Adaptive Learning, Infrastructure, Scalability |
| Shams et al. (2023) | Diversity, Fairness, Trust, Algorithmic Oppression | Inclusion, Transparency, Discrimination | 92% | Diversity, Fairness, Trust, Algorithmic Oppression, Transparency |
| Herath et al. (2025) | SDGs, Sustainability, Ethical AI | Sustainable Development, AI Ethics | 89% | SDGs, Sustainability, Ethical AI, Sustainable Development |
| Diaz (2025) | Ethical Dilemmas, Regulation, Bias | AI Ethics, Risk Mitigation, Privacy | 87% | Ethical Dilemmas, Regulation, Bias, Risk Mitigation |
| Zowghi & Bano (2024) | Inclusive AI, Marginalization, Fairness | Diversity, Ethical Design, Accountability | 91% | Inclusive AI, Marginalization, Fairness, Accountability |
| Muralidharan et al. (2024) | Pediatric AI, LMICs, Data Bias | Global Health, Governance, Equity | 86% | Pediatric AI, LMICs, Data Bias, Equity |
| Sahebi & Formosa (2024) | Global Justice, Capabilities Approach, Exploitation | Labor Ethics, Environmental Harm, Dignity | 93% | Global Justice, Capabilities Approach, Exploitation, Dignity |
| Curtis et al. (2024) | Human-Centered AI, Positionality, Comparative Education | Anthropocene, Interdisciplinary | 84% | Human-Centered AI, Positionality, Comparative Education |
| Papakostas (2025) | Theological Ethics, AI in RE, Epistemic Conformity | Spiritual Formation, Data Privacy | 88% | Theological Ethics, AI in RE, Epistemic Conformity, Data Privacy |
| Devi et al. (2025) | Personalized Learning, Administrative Efficiency, Ethical AI | Inclusivity, Language Barriers | 87% | Personalized Learning, Administrative Efficiency, Ethical AI, Inclusivity |
| Ilcic et al. (2025) | Systemic Resilience, Complexity Science, Governance Gaps | Adaptive Governance, Equity | 90% | Systemic Resilience, Complexity Science, Governance Gaps, Equity |
| Gondwe (2025) | Ubuntu Philosophy, AI Journalism, Inclusivity | Relational Ethics, Representativeness | 89% | Ubuntu Philosophy, AI Journalism, Inclusivity, Representativeness |
| Henadirage & Gunarathne (2025) | Policy Gaps, GenAI Reliability, Resistance to Adoption | South Asia, Academic Expertise | 85% | Policy Gaps, GenAI Reliability, Resistance to Adoption, Academic Expertise |

Abu-Lughod, L. (2025). From the Politics of Representation to the Ethics of Decolonization. *Daedalus*, *154*(2), 189–203. https://www.jstor.org/stable/48820595

Adams, C., Pente, P., Lemermeyer, G., & Rockwell, G. (2023). Ethical principles for artificial intelligence in K-12 education. *Computers and Education: Artificial Intelligence*, *4*, 100131. https://doi.org/10.1016/j.caeai.2023.100131

Adetayo, A. J., Aborisade, M. O., & Sanni, B. A. (2024). Microsoft Copilot and Anthropic Claude AI in education and library service. *Library Hi Tech News*. https://doi.org/10.1108/LHTN-01-2024-0002

Akpan, I. J., Offodile, O. F., Akpanobong, A. C., & Kobara, Y. M. (2024). A Comparative Analysis of Virtual Education Technology, E-Learning Systems Research Advances, and Digital Divide in the Global South. *Informatics*, *11*(3), 53. https://doi.org/10.3390/informatics11030053

Aler Tubella, A., Mora-Cantallops, M., & Nieves, J. C. (2024). How to teach responsible AI in Higher Education: challenges and opportunities. *Ethics and Information Technology*, *26*(1), 3. https://doi.org/10.1007/s10676-023-09733-7

Almassaad, A., Alajlan, H., & Alebaikan, R. (2024). Student Perceptions of Generative Artificial Intelligence: Investigating Utilization, Benefits, and Challenges in Higher Education. *Systems*, *12*(10), 385. https://doi.org/10.3390/systems12100385

Almufareh, M. F., Kausar, S., Humayun, M., & Tehsin, S. (2024). A Conceptual Model for Inclusive Technology: Advancing Disability Inclusion through Artificial Intelligence. *Journal of Disability Research*, *3*(1). https://doi.org/10.57197/JDR-2023-0060

Ammah, L. N. A., Lütge, C., Kriebitz, A., & Ramkissoon, L. (2024). AI4people − an ethical framework for a good AI society: the Ghana (Ga) perspective. *Journal of Information, Communication and Ethics in Society*, *22*(4), 453–465. https://doi.org/10.1108/JICES-06-2024-0072

Arora, A., Barrett, M., Lee, E., Oborn, E., & Prince, K. (2023). Risk and the future of AI: Algorithmic bias, data colonialism, and marginalization. *Information and Organization*, *33*(3), 100478. https://doi.org/10.1016/j.infoandorg.2023.100478

Baker, R. S., & Hawn, A. (2022). Algorithmic Bias in Education. *International Journal of Artificial Intelligence in Education*, *32*(4), 1052–1092. https://doi.org/10.1007/s40593-021-00285-9

Bannor, G. A., Boateng, F. O., & Arthur, Y. D. (2025). Effects of ethics, regulations, and training regarding responsible AI use on continued use intentions of gen AI chatbots: structural equation model of university students perceptions. *AI and Ethics*. https://doi.org/10.1007/s43681-025-00755-z

Barman, K. G., Wood, N., & Pawlowski, P. (2024). Beyond transparency and explainability: on the need for adequate and contextualized user guidelines for LLM use. *Ethics and Information Technology*, *26*(3), 47. https://doi.org/10.1007/s10676-024-09778-2

Bečulić, H., Begagić, E., Skomorac, R., Mašović, A., Selimović, E., & Pojskić, M. (2023). ChatGPT’s contributions to the evolution of neurosurgical practice and education: a systematic review of benefits, concerns and limitations. *Medicinski Glasnik*, *21*(1), 126–131. https://doi.org/10.17392/1661-23

Chauncey, S. A., & McKenna, H. P. (2023). A framework and exemplars for ethical and responsible use of AI Chatbot technology to support teaching and learning. *Computers and Education: Artificial Intelligence*, *5*, 100182. https://doi.org/10.1016/j.caeai.2023.100182

Curtis, S. M. S., Desimoni, V., Crumley-Effinger, M., Salajan, F. D., & Jules, tavis d. (2024). Artificial Intelligence in Comparative and International Education in the Age of the Anthropocene. In *The Technological-Industrial Complex and Education* (pp. 1–8). Springer Nature Switzerland. https://doi.org/10.1007/978-3-031-60469-0_1

Davy Tsz Kit, N. G., Luo, W., Chan, H. M. Y., & Chu, S. K. W. (2022). Using digital story writing as a pedagogy to develop AI literacy among primary students. *Computers and Education: Artificial Intelligence*, *3*, 100054. https://doi.org/10.1016/j.caeai.2022.100054

Di Chiro, G. (2014). Response: Reengaging Environmental Education in the ‘Anthropocene.’ *Australian Journal of Environmental Education*, *30*(1), 17–17. https://doi.org/10.1017/aee.2014.18

Du, H., Sun, Y., Jiang, H., Islam, A. Y. M. A., & Gu, X. (2024). Exploring the effects of AI literacy in teacher learning: an empirical study. *Humanities and Social Sciences Communications*, *11*(1), 559. https://doi.org/10.1057/s41599-024-03101-6

Esmaeilzadeh, P. (2024). Challenges and strategies for wide-scale artificial intelligence (AI) deployment in healthcare practices: A perspective for healthcare organizations. *Artificial Intelligence in Medicine*, *151*. https://doi.org/10.1016/j.artmed.2024.102861

Fedock, B., Paladino, A., Bailey, L., & Moses, B. (2018). Perceptions of robotics emulation of human ethics in educational settings: a content analysis. *Journal of Research in Innovative Teaching & Learning*, *11*(2), 126–138. https://doi.org/10.1108/JRIT-02-2018-0004

Fundi, M., Sanusi, I. T., Oyelere, S. S., & Ayere, M. (2024). Advancing AI education: Assessing Kenyan in-service teachers’ preparedness for integrating artificial intelligence in competence-based curriculum. *Computers in Human Behavior Reports*, *14*, 100412. https://doi.org/10.1016/j.chbr.2024.100412

Gondwe, G. (2024). Artificial Intelligence, Journalism, and the Ubuntu Robot in Sub-Saharan Africa: Towards a Normative Framework. *Digital Journalism*, 1–19. https://doi.org/10.1080/21670811.2024.2311258

Hassan, Y. (2023). Governing algorithms from the South: a case study of AI development in Africa. *AI & SOCIETY*, *38*(4), 1429–1442. https://doi.org/10.1007/s00146-022-01527-7

Heeks, R. (2022). Digital inequality beyond the digital divide: conceptualizing adverse digital incorporation in the global South. *Information Technology for Development*, *28*(4), 688–704. https://doi.org/10.1080/02681102.2022.2068492

Henadirage, A., & Gunarathne, N. (2025). Barriers to and Opportunities for the Adoption of Generative Artificial Intelligence in Higher Education in the Global South: Insights from Sri Lanka. *International Journal of Artificial Intelligence in Education*, *35*(1), 245–281. https://doi.org/10.1007/s40593-024-00439-5

Herath, S. K., Sodige, D. S., & Kalupahanage, D. P. (2024). AI Applications for Sustainable Development Goals. In *Delphi - Interdisciplinary Review of Emerging Technologies* (Vol. 2, Issue 4, pp. 351–370). https://doi.org/10.4018/979-8-3693-6392-8.ch017

Hove-Sibanda, P., Motshidisi, M., & Igwe, P. A. (2021). Supply chain risks, technological and digital challenges facing grocery retailers in South Africa. *Journal of Enterprising Communities: People and Places in the Global Economy*, *15*(2), 228–245. https://doi.org/10.1108/JEC-05-2020-0104

Hussein, E., Hussein, M., & Al-Hendawi, M. (2025). Investigation into the Applications of Artificial Intelligence (AI) in Special Education: A Literature Review. *Social Sciences*, *14*(5), 288. https://doi.org/10.3390/socsci14050288

Ilcic, A., Fuentes, M., & Lawler, D. (2025). Artificial intelligence, complexity, and systemic resilience in global governance. *Frontiers in Artificial Intelligence*, *8*. https://doi.org/10.3389/frai.2025.1562095

Kamila, M. K., & Jasrotia, S. S. (2023). Ethical issues in the development of artificial intelligence: recognizing the risks. *International Journal of Ethics and Systems*. https://doi.org/10.1108/IJOES-05-2023-0107

Katznelson, G., & Gerke, S. (2021). The need for health AI ethics in medical school education. *Advances in Health Sciences Education*, *26*(4), 1447–1458. https://doi.org/10.1007/s10459-021-10040-3

Kayyali, M. (2025). *Ethical Implications of Generative AI in Education* (pp. 185–218). https://doi.org/10.4018/979-8-3693-8744-3.ch008

Kim, J., Lee, H., & Cho, Y. H. (2022). Learning design to support student-AI collaboration: perspectives of leading teachers for AI in education. *Education and Information Technologies*, *27*(5), 6069–6104. https://doi.org/10.1007/s10639-021-10831-6

Kumar, D., & Suthar, N. (2025). *AI-Enabled Humanoid Devices Bridging Personalized Learning and Inclusive Education for Cyber Nomads* (pp. 41–72). https://doi.org/10.4018/979-8-3693-8985-0.ch003

Kwet, M. (2019). Digital colonialism: US empire and the new imperialism in the Global South. *Race & Class*, *60*(4), 3–26. https://doi.org/10.1177/0306396818823172

Langthaler, M. ;, Bazafkan, & Homa. (2020). Digitalization, education and skills development in the global South: An assessment of the debate with a focus on Sub-Saharan Africa. *Journal of Development Effectiveness*, *14*(1), 4–18. https://doi.org/10.60637/2020-bp28

Lee, J., Hong, M., & Cho, J. (2024). Development of a Content Framework of Artificial Intelligence Integrated Education Considering Ethical Factors. *International Journal on Advanced Science, Engineering and Information Technology*, *14*(1), 205–213. https://doi.org/10.18517/ijaseit.14.1.19558

Lin, X.-F., Wang, Z., Zhou, W., Luo, G., Hwang, G.-J., Zhou, Y., Wang, J., Hu, Q., Li, W., & Liang, Z.-M. (2023). Technological support to foster students’ artificial intelligence ethics: An augmented reality-based contextualized dilemma discussion approach. *Computers & Education*, *201*, 104813. https://doi.org/10.1016/j.compedu.2023.104813

Liu, Z. (2025). Cultural Bias in Large Language Models: A Comprehensive Analysis and Mitigation Strategies. *Journal of Transcultural Communication*, *3*(2), 224–244. https://doi.org/10.1515/jtc-2023-0019

Lombana Diaz, C. (2025). *AI Ethics* (pp. 439–474). https://doi.org/10.1007/978-3-031-61375-3_5

Madlberger, L. (2017). Gotong royong in NLP research a mobile tool for collaborative text annotation in Indonesia. In *Proceedings of the 2016 International Conference on Asian Language Processing Ialp 2016* (pp. 99–102). https://doi.org/10.1109/IALP.2016.7875944

Mager, A., Eitenberger, M., Winter, J., Prainsack, B., Wendehorst, C., & Arora, P. (2025). Situated ethics: Ethical accountability of local perspectives in global AI ethics. *Media, Culture & Society*. https://doi.org/10.1177/01634437251328200

Makeleni, S., Mutongoza, B. H., & Linake, M. A. (2023). Language Education and Artificial Intelligence: An Exploration of Challenges Confronting Academics in Global South Universities. *Journal of Culture and Values in Education*, *6*(2), 158–171. https://doi.org/10.46303/jcve.2023.14

Manjula Devi, C., Gobinath, A., & Ilango, D. (2025). *Artificial Intelligence in Training and Education* (pp. 143–162). https://doi.org/10.4018/979-8-3373-1275-0.ch007

Mbunge, E., Batani, J., Gaobotse, G., & Muchemwa, B. (2022). Virtual healthcare services and digital health technologies deployed during coronavirus disease 2019 (COVID-19) pandemic in South Africa: a systematic review. *Global Health Journal*, *6*(2), 102–113. https://doi.org/10.1016/j.glohj.2022.03.001

Monasterio Astobiza, A., Ausín, T., Liedo, B., Toboso, M., Aparicio, M., & López, D. (2022). Ethical Governance of AI in the Global South: A Human Rights Approach to Responsible Use of AI. *The 2021 Summit of the International Society for the Study of Information*, 136. https://doi.org/10.3390/proceedings2022081136

Muralidharan, V., Schamroth, J., Youssef, A., Celi, L. A., & Daneshjou, R. (2024). Applied artificial intelligence for global child health: Addressing biases and barriers. *PLOS Digital Health*, *3*(8). https://doi.org/10.1371/journal.pdig.0000583

Nazer, L. H., Zatarah, R., Waldrip, S., Ke, J. X. C., Moukheiber, M., Khanna, A. K., Hicklen, R. S., Moukheiber, L., Moukheiber, D., Ma, H., & Mathur, P. (2023). Bias in artificial intelligence algorithms and recommendations for mitigation. *PLOS Digital Health*, *2*(6), e0000278. https://doi.org/10.1371/journal.pdig.0000278

Ng, D. T. K., Leung, J. K. L., Chu, K. W. S., & Qiao, M. S. (2021a). AI Literacy: Definition, Teaching, Evaluation and Ethical Issues. *Proceedings of the Association for Information Science and Technology*, *58*(1), 504–509. https://doi.org/10.1002/pra2.487

Ng, D. T. K., Leung, J. K. L., Chu, S. K. W., & Qiao, M. S. (2021b). Conceptualizing AI literacy: An exploratory review. *Computers and Education: Artificial Intelligence*, *2*, 100041. https://doi.org/10.1016/j.caeai.2021.100041

Nkwo, M., Ikwunne, T., Adejoro, C., & Anuyah, O. (2025). *Exploring Usability of AI Systems in the Global South—Toward Responsible Human-Centered AI for Sustainable Cities and Communities* (pp. 125–165). https://doi.org/10.1007/978-3-031-88326-2_5

Novozhilova, E., Mays, K., Paik, S., & Katz, J. E. (2024). More Capable, Less Benevolent: Trust Perceptions of AI Systems across Societal Contexts. *Machine Learning and Knowledge Extraction*, *6*(1), 342–366. https://doi.org/10.3390/make6010017

Olojede, H. T. (2023). Towards African Artificial Intelligence Ethical Principles. *2023 First International Conference on the Advancements of Artificial Intelligence in African Context (AAIAC)*, 1–6. https://doi.org/10.1109/AAIAC60008.2023.10465379

Papakostas, C. (2025). Artificial Intelligence in Religious Education: Ethical, Pedagogical, and Theological Perspectives. *Religions*, *16*(5), 563. https://doi.org/10.3390/rel16050563

Parkinson, S. E. (2025). Indiana Jones & the Institutional Review Board: Disciplinary Incentives, Researcher Archetypes & the Pathologies of Knowledge Production. *JSTOR*, *154*(2), 93–113. https://www.jstor.org/stable/48820590

Perchik, J. D., Smith, A. D., Elkassem, A. A., Park, J. M., Rothenberg, S. A., Tanwar, M., Yi, P. H., Sturdivant, A., Tridandapani, S., & Sotoudeh, H. (2023). Artificial Intelligence Literacy: Developing a Multi-institutional Infrastructure for AI Education. *Academic Radiology*, *30*(7), 1472–1480. https://doi.org/10.1016/j.acra.2022.10.002

Pessach, D., & Shmueli, E. (2023). A Review on Fairness in Machine Learning. *ACM Computing Surveys*, *55*(3), 1–44. https://doi.org/10.1145/3494672

Popenici, S., Rudolph, J., Tan, S., & Tan, S. (2023). A critical perspective on generative AI and learning futures. An interview with Stefan Popenici. *Journal of Applied Learning and Teaching*, *6*(2), 311–331. https://doi.org/10.37074/jalt.2023.6.2.5

Ravšelj, D., Keržič, D., Tomaževič, N., Umek, L., Brezovar, N., A. Iahad, N., Abdulla, A. A., Akopyan, A., Aldana Segura, M. W., AlHumaid, J., Allam, M. F., Alló, M., Andoh, R. P. K., Andronic, O., Arthur, Y. D., Aydın, F., Badran, A., Balbontín-Alvarado, R., Ben Saad, H., … Aristovnik, A. (2025). Higher education students’ perceptions of ChatGPT: A global study of early reactions. *PLOS ONE*, *20*(2), e0315011. https://doi.org/10.1371/journal.pone.0315011

Reid, C., & Major, J. (2017). *Global Teaching: Southern Perspectives on Teachers Working with Diversity*. Palgrave Macmillan US.

Roche, C., Wall, P. J., & Lewis, D. (2023). Ethics and diversity in artificial intelligence policies, strategies and initiatives. *AI and Ethics*, *3*(4), 1095–1115. https://doi.org/10.1007/s43681-022-00218-9

Ryan, M., & Stahl, B. C. (2021). Artificial intelligence ethics guidelines for developers and users: clarifying their content and normative implications. *Journal of Information, Communication and Ethics in Society*, *19*(1), 61–86. https://doi.org/10.1108/JICES-12-2019-0138

Sahebi, S., & Formosa, P. (2024). Artificial Intelligence (AI) and Global Justice. *Minds and Machines*, *35*(1), 4. https://doi.org/10.1007/s11023-024-09708-7

Samek, T., & Samek, T. (2022). Teaching and Learning the Ninth Principle of the ALA Code of Ethics. *Proceedings of the ALISE Annual Conference*. https://doi.org/10.21900/j.alise.2022.1030

Sanchez, T. W., Brenman, M., & Ye, X. (2024). The Ethical Concerns of Artificial Intelligence in Urban Planning. *Journal of the American Planning Association*, 1–14. https://doi.org/10.1080/01944363.2024.2355305

Schiff, D. (2022). Education for AI, not AI for Education: The Role of Education and Ethics in National AI Policy Strategies. *International Journal of Artificial Intelligence in Education*, *32*(3), 527–563. https://doi.org/10.1007/s40593-021-00270-2

Shams, R. A., Zowghi, D., & Bano, M. (2023). AI and the quest for diversity and inclusion: a systematic literature review. *AI and Ethics*. https://doi.org/10.1007/s43681-023-00362-w

Song, A., & Ko, J. (2024). Preservice ethics teachers’ perceptions of AI ethics education. *Journal of Moral Education*, 1–24. https://doi.org/10.1080/03057240.2024.2393353

Stolpe, K., & Hallström, J. (2024). Artificial intelligence literacy for technology education. *Computers and Education Open*, *6*, 100159. https://doi.org/10.1016/j.caeo.2024.100159

Usher, M., & Barak, M. (2024). Unpacking the role of AI ethics online education for science and engineering students. *International Journal of STEM Education*, *11*(1), 35. https://doi.org/10.1186/s40594-024-00493-4

Vartiainen, H., & Tedre, M. (2023). Using artificial intelligence in craft education: crafting with text-to-image generative models. *Digital Creativity*, *34*(1), 1–21. https://doi.org/10.1080/14626268.2023.2174557

Venkat Narayana Rao, T., Madhuri, B. K., Bhavana, S., & Swetha, C. (2025). *Ethical and Social Issues of AI in Education* (pp. 421–438). https://doi.org/10.4018/979-8-3373-2262-9.ch014

Vetter, M. A., Lucia, B., Jiang, J., & Othman, M. (2024). Towards a framework for local interrogation of AI ethics: A case study on text generators, academic integrity, and composing with ChatGPT. *Computers and Composition*, *71*, 102831. https://doi.org/10.1016/j.compcom.2024.102831

Wach, K., Duong, C. D., Ejdys, J., Kazlauskaitė, R., Korzynski, P., Mazurek, G., Paliszkiewicz, J., & Ziemba, E. (2023). The dark side of generative artificial intelligence: A critical analysis of controversies and risks of ChatGPT. *Entrepreneurial Business and Economics Review*, *11*(2), 7–30. https://doi.org/10.15678/EBER.2023.110201

Wakunuma, K., & Eke, D. (2024). Africa, ChatGPT, and Generative AI Systems: Ethical Benefits, Concerns, and the Need for Governance. *Philosophies*, *9*(3). https://doi.org/10.3390/philosophies9030080

Wang, R., Chaudhari, P., & Davatzikos, C. (2023). Bias in machine learning models can be significantly mitigated by careful training: Evidence from neuroimaging studies. *Proceedings of the National Academy of Sciences*, *120*(6). https://doi.org/10.1073/pnas.2211613120

Waterman, S. J. (2019). New Research Perspectives on Native American Students in Higher Education. *Jcscore*, *5*(1), 60–80. https://doi.org/10.15763/issn.2642-2387.2019.5.1.60-80

White, J. (2025). Augmenting morality through ethics education: the ACTWith model. *AI & SOCIETY*, *40*(2), 839–858. https://doi.org/10.1007/s00146-024-01864-9

Wójcik, M. (2021). Augmented intelligence technology. The ethical and practical problems of its implementation in libraries. *Library Hi Tech*, *39*(2), 435–447. https://doi.org/10.1108/LHT-02-2020-0043

Yadav, M., Singh, S. K., Sharma, P., & Hung, T. H. (2024). AI and Lifelong Learning in Developing Countries: Investigate the Potential of AI to Support Lifelong Learning and Development in Low-Resource Contexts. *Impacts of Generative AI on the Future of Research and Education*, 49–71. https://doi.org/10.4018/979-8-3693-0884-4.ch003

Yadav, R., Yadav, M., Huzooree, G., Najeeb, A., & Ranasinghe, A. (2025). Accessibility and inclusivity in AI-powered personalized learning. *Transformative AI Practices for Personalized Learning Strategies*, 47–67. https://doi.org/10.4018/979-8-3693-8744-3.ch003

Zembylas, M. (2023). A decolonial approach to AI in higher education teaching and learning: strategies for undoing the ethics of digital neocolonialism. *Learning, Media and Technology*, *48*(1), 25–37. https://doi.org/10.1080/17439884.2021.2010094

Zhang, H., Lee, I., Ali, S., DiPaola, D., Cheng, Y., & Breazeal, C. (2023). Integrating Ethics and Career Futures with Technical Learning to Promote AI Literacy for Middle School Students: An Exploratory Study. *International Journal of Artificial Intelligence in Education*, *33*(2), 290–324. https://doi.org/10.1007/s40593-022-00293-3

Zowghi, D., & Bano, M. (2024). AI for all: Diversity and Inclusion in AI. *AI and Ethics*, *4*(4), 873–876. https://doi.org/10.1007/s43681-024-00485-8
